# Supplementary material for: Population Genomic Analyses Based on 1 Million SNPs in Commercial Egg Layers
Source: PubMed Central journal article supplement (PMC3989219; doi:10.1371/journal.pone.0094509), 2014-04-16
Supplement: pone.0094509.s002.pdf [file pone.0094509.s002.pdf]

Table S2. List of genes in of upper 1%  $F_{ST}$  distribution in comparison of commercial layers and out-group.

| Chr | Start    | End      | Description                                                     | Fst   |
|-----|----------|----------|-----------------------------------------------------------------|-------|
| 1   | 9325096  | 9459193  | semaphorin-3E precursor                                         | 0.261 |
| 1   | 9561909  | 9881531  | piccolo presynaptic cytomatrix protein                          | 0.261 |
| 1   | 15929586 | 15971452 | ceramide kinase                                                 | 0.242 |
| 1   | 15997492 | 16152675 | TBC1 domain family member 22A                                   | 0.242 |
| 1   | 25847642 | 26191414 | FoxP2; Uncharacterized protein                                  | 0.227 |
| 1   | 31999958 | 32082280 | monocarboxylate transporter 2                                   | 0.230 |
| 1   | 35013708 | 35017857 | Interferon gamma                                                | 0.203 |
| 1   | 35062146 | 35064598 | interleukin-22 precursor                                        | 0.203 |
| 1   | 35074941 | 35098051 | Mdm1 nuclear protein homolog (mouse)                            | 0.203 |
| 1   | 35173230 | 35206537 | Ras-related protein Rap-1b                                      | 0.203 |
| 1   | 35208345 | 35233387 | nucleoporin 107kDa                                              | 0.203 |
| 1   | 35234300 | 35239841 | solute carrier family 35 member E3                              | 0.203 |
| 1   | 35255810 | 35267006 | Mdm2, transformed 3T3 cell double minute 2, p53 binding protein | 0.203 |
| 1   | 35273571 | 35305258 | carboxypeptidase M precursor                                    | 0.203 |
| 1   | 35343616 | 35368673 | Cleavage and polyadenylation specificity factor subunit 6       | 0.203 |
| 1   | 36575949 | 36791862 | thyrotropin-releasing hormone degrading enzyme                  | 0.213 |
| 1   | 43171637 | 43175978 | dual specificity protein phosphatase 6                          | 0.252 |
| 1   | 43207669 | 43254712 | WD repeat-containing protein 51B                                | 0.252 |
| 1   | 43273706 | 43305815 | plasma membrane calcium-transporting ATPase 1                   | 0.252 |
| 1   | 43798643 | 43821219 | Epiphycan                                                       | 0.252 |
| 1   | 43843145 | 43851618 | Keratocan                                                       | 0.252 |
| 1   | 43860883 | 43872867 | Lumican                                                         | 0.252 |
| 1   | 43894096 | 43932320 | decorin precursor                                               | 0.252 |
| 1   | 44271338 | 44273899 | Protein BTG1                                                    | 0.252 |
| 1   | 44690009 | 44710912 | nudix (nucleoside diphosphate linked moiety X)-type motif 4     | 0.252 |
| 1   | 44714689 | 44733745 | ubiquitin-conjugating enzyme E2 N                               | 0.252 |
| 1   | 44764153 | 44768210 | suppressor of cytokine signaling 2                              | 0.252 |

|   |          |          |                                                                       |       |
|---|----------|----------|-----------------------------------------------------------------------|-------|
| 1 | 44775335 | 44851153 | death domain-containing protein CRADD                                 | 0.252 |
| 1 | 45179843 | 45187320 | NADH dehydrogenase                                                    | 0.252 |
| 1 | 45195370 | 45239814 | nuclear receptor subfamily 2 group C member 1                         | 0.252 |
| 1 | 45245468 | 45308710 | FYVE, RhoGEF and PH domain containing 6                               | 0.252 |
| 1 | 45406753 | 45421533 | methionine aminopeptidase 2                                           | 0.252 |
| 1 | 45425569 | 45437573 | Ubiquitin carboxyl-terminal hydrolase                                 | 0.252 |
| 1 | 46488737 | 46510905 | lamina-associated polypeptide 2, isoform beta                         | 0.265 |
| 1 | 46514910 | 46522801 | phosphate carrier protein, mitochondrial                              | 0.265 |
| 1 | 46530982 | 46536438 | IKBKB interacting protein                                             | 0.265 |
| 1 | 46520990 | 46521230 | Small nucleolar RNA SNORA53                                           | 0.265 |
| 1 | 49977775 | 50105059 | trinucleotide repeat containing 6B                                    | 0.219 |
| 1 | 50154190 | 50196801 | GRB2-related adaptor protein 2                                        | 0.219 |
| 1 | 50448547 | 50450694 | active regulator of SIRT1                                             | 0.219 |
| 1 | 50456693 | 50459626 | cyclic AMP-dependent transcription factor ATF-4                       | 0.219 |
| 1 | 50517363 | 50525791 | TGF-beta-activated kinase 1 and MAP3K7-binding protein 1              | 0.219 |
| 1 | 50534583 | 50544913 | synaptogyrin 1                                                        | 0.219 |
| 1 | 50548764 | 50554568 | 60S ribosomal protein L3                                              | 0.219 |
| 1 | 50582287 | 50594411 | platelet-derived growth factor subunit B precursor                    | 0.219 |
| 1 | 50609571 | 50619165 | chromobox homolog 7                                                   | 0.219 |
| 1 | 50490804 | 50492294 | beta-1,4-mannosyl-glycoprotein 4-beta-N-acetylglucosaminyltransferase | 0.219 |
| 1 | 50552408 | 50552500 | Small nucleolar RNA U83B                                              | 0.219 |
| 1 | 50354165 | 50354490 | 7SK RNA                                                               | 0.219 |
| 1 | 51759800 | 51835231 | RNA binding protein, fox-1 homolog (C. elegans) 2                     | 0.211 |
| 1 | 51849854 | 51853554 | Myoglobin                                                             | 0.211 |
| 1 | 51939574 | 51947830 | DNA replication licensing factor MCM5                                 | 0.211 |
| 1 | 51949101 | 51955226 | heme oxygenase 1                                                      | 0.211 |
| 1 | 51962485 | 51983162 | Target of Myb protein 1                                               | 0.211 |
| 1 | 54494944 | 54562153 | Solute carrier family 41 member 2                                     | 0.213 |
| 1 | 55745325 | 55820855 | myosin binding protein C, slow type                                   | 0.198 |
| 1 | 58356941 | 58391611 | myotrophin                                                            | 0.205 |

|   |          |          |                                                                             |       |
|---|----------|----------|-----------------------------------------------------------------------------|-------|
| 1 | 58482771 | 58513575 | family with sequence similarity 180, member A                               | 0.205 |
| 1 | 60698479 | 60974728 | ELKS/RAB6-interacting/CAST family member 1                                  | 0.219 |
| 1 | 61044205 | 61059847 | protein Wnt-5b precursor                                                    | 0.219 |
| 1 | 61067944 | 61110429 | adiponectin receptor protein 2                                              | 0.219 |
| 1 | 61241662 | 61287347 | decapping mRNA 1B                                                           | 0.219 |
| 1 | 61121260 | 61123185 | CHUNK-1 protein                                                             | 0.219 |
| 1 | 62933511 | 63081609 | receptor-type tyrosine-protein phosphatase O                                | 0.199 |
| 1 | 63087279 | 63140780 | epidermal growth factor receptor pathway substrate 8                        | 0.199 |
| 1 | 63250603 | 63259735 | Serine-threonine kinase receptor-associated protein                         | 0.199 |
| 1 | 63261392 | 63316947 | putative deoxyribose-phosphate aldolase                                     | 0.199 |
| 1 | 63429485 | 63435977 | microsomal glutathione S-transferase 1                                      | 0.199 |
| 1 | 66068227 | 66322847 | transcription factor SOX-5                                                  | 0.250 |
| 1 | 68357089 | 68442009 | liprin-beta-1                                                               | 0.292 |
| 1 | 68516162 | 68549653 | ADP-ribosylation factor GTPase-activating protein 3                         | 0.292 |
| 1 | 68556334 | 68619317 | protein kinase C and casein kinase substrate in neurons protein 2 isoform 1 | 0.292 |
| 1 | 68626823 | 68645266 | tubulin tyrosine ligase-like family, member 1                               | 0.292 |
| 1 | 68667862 | 68672968 | malonyl CoA:ACP acyltransferase (mitochondrial)                             | 0.292 |
| 1 | 68683782 | 68704548 | tubulin--tyrosine ligase-like protein 12                                    | 0.292 |
| 1 | 68715574 | 68928375 | signal peptide, CUB domain, EGF-like 1                                      | 0.292 |
| 1 | 69162384 | 69195805 | sulfotransferase family 4A, member 1                                        | 0.292 |
| 1 | 69327839 | 69350968 | parvin, gamma                                                               | 0.292 |
| 1 | 68833800 | 68833975 | TUC338                                                                      | 0.292 |
| 1 | 70098157 | 70154426 | PHD finger protein 21B                                                      | 0.215 |
| 1 | 72902806 | 73148067 | fatty acyl CoA reductase 2                                                  | 0.224 |
| 1 | 76247535 | 76251880 | cystatin B (stefin B)                                                       | 0.233 |
| 1 | 76253583 | 76258549 | cystatin A (stefin A)                                                       | 0.233 |
| 1 | 76278352 | 76285046 | family with sequence similarity 162, member A                               | 0.233 |
| 1 | 76288629 | 76339983 | Importin subunit alpha-1                                                    | 0.233 |
| 1 | 76360081 | 76368699 | tapasin-related protein                                                     | 0.233 |
| 1 | 76382783 | 76390957 | amiloride-sensitive sodium channel subunit alpha                            | 0.233 |

|   |          |          |                                                         |       |
|---|----------|----------|---------------------------------------------------------|-------|
| 1 | 76396666 | 76398676 | vesicle-associated membrane protein 1 (synaptobrevin 1) | 0.233 |
| 1 | 76399984 | 76401537 | 39S ribosomal protein L51, mitochondrial                | 0.233 |
| 1 | 76401717 | 76426364 | non-SMC condensin I complex, subunit D2                 | 0.233 |
| 1 | 76430011 | 76431726 | C-type natriuretic peptide 1 precursor                  | 0.233 |
| 1 | 76434647 | 76437498 | Glyceraldehyde-3-phosphate dehydrogenase                | 0.233 |
| 1 | 76463548 | 76468438 | NOP2 nucleolar protein                                  | 0.233 |
| 1 | 76468778 | 76489284 | chromodomain helicase DNA binding protein 4             | 0.233 |
| 1 | 76507821 | 76515304 | lysophosphatidic acid receptor 5                        | 0.233 |
| 1 | 76520460 | 76539139 | acrosin binding protein                                 | 0.233 |
| 1 | 76548297 | 76563040 | Inhibitor of growth protein 4                           | 0.233 |
| 1 | 76630627 | 76633759 | COP9 signalosome complex subunit 7a                     | 0.233 |
| 1 | 76644865 | 76651986 | myeloid leukemia factor 2                               | 0.233 |
| 1 | 76713681 | 76725911 | leprecan-like 2                                         | 0.233 |
| 1 | 76738644 | 76753824 | ubiquitin specific peptidase 5 (isopeptidase T)         | 0.233 |
| 1 | 76754054 | 76757054 | Triosephosphate isomerase                               | 0.233 |
| 1 | 76766963 | 76776197 | gamma-enolase                                           | 0.233 |
| 1 | 76472752 | 76472892 | Small Cajal body specific RNA 11                        | 0.233 |
| 1 | 76402298 | 76402618 | Small nucleolar RNA U85                                 | 0.233 |
| 1 | 78926395 | 79112873 | syntaxin binding protein 5-like                         | 0.197 |
| 1 | 84389704 | 84521596 | ABI family, member 3 (NESH) binding protein             | 0.223 |
| 1 | 84610640 | 84660808 | interphotoreceptor matrix proteoglycan 2 precursor      | 0.223 |
| 1 | 84665305 | 84703930 | SUMO1/sentrin specific peptidase 7                      | 0.223 |
| 1 | 84714811 | 84724364 | PEST proteolytic signal-containing nuclear protein      | 0.223 |
| 1 | 84747544 | 84751604 | ribosomal protein L24                                   | 0.223 |
| 1 | 84799655 | 84816004 | NF-kappa-B inhibitor zeta                               | 0.223 |
| 1 | 85893284 | 86010821 | CD166 antigen                                           | 0.223 |
| 1 | 86037078 | 86159219 | Cbl proto-oncogene B, E3 ubiquitin protein ligase       | 0.223 |
| 1 | 91358735 | 91424437 | prostaglandin F2 receptor inhibitor                     | 0.208 |
| 1 | 91431223 | 91441019 | CD101 molecule                                          | 0.208 |
| 1 | 1.08E+08 | 1.08E+08 | Down syndrome cell adhesion molecule                    | 0.227 |

|   |          |          |                                                                                       |       |
|---|----------|----------|---------------------------------------------------------------------------------------|-------|
| 1 | 1.09E+08 | 1.09E+08 | radial spoke head 1 homolog (Chlamydomonas)                                           | 0.207 |
| 1 | 1.09E+08 | 1.09E+08 | solute carrier family 37 (glucose-6-phosphate transporter), member 1                  | 0.207 |
| 1 | 1.09E+08 | 1.09E+08 | phosphodiesterase 9A                                                                  | 0.207 |
| 1 | 1.09E+08 | 1.09E+08 | NADH dehydrogenase                                                                    | 0.207 |
| 1 | 1.17E+08 | 1.17E+08 | DNA polymerase                                                                        | 0.283 |
| 1 | 1.17E+08 | 1.18E+08 | phosphate cytidylyltransferase 1, choline, beta                                       | 0.283 |
| 1 | 1.17E+08 | 1.17E+08 | U1 spliceosomal RNA                                                                   | 0.283 |
| 1 | 1.17E+08 | 1.17E+08 | Small Cajal body specific RNA 24                                                      | 0.283 |
| 1 | 1.3E+08  | 1.31E+08 | gamma-aminobutyric acid (GABA) A receptor, gamma 3                                    | 0.210 |
| 1 | 1.31E+08 | 1.31E+08 | Gamma-aminobutyric acid receptor subunit beta-3                                       | 0.210 |
| 1 | 1.36E+08 | 1.36E+08 | ras GTPase-activating protein 3                                                       | 0.255 |
| 1 | 1.44E+08 | 1.44E+08 | dedicator of cytokinesis 9                                                            | 0.224 |
| 1 | 1.45E+08 | 1.46E+08 | multidrug resistance-associated protein 4                                             | 0.230 |
| 1 | 1.47E+08 | 1.47E+08 | glypican 5                                                                            | 0.204 |
| 1 | 1.49E+08 | 1.49E+08 | SLIT and NTRK-like family, member 5                                                   | 0.264 |
| 1 | 1.52E+08 | 1.52E+08 | protein sprouty homolog 2                                                             | 0.267 |
| 1 | 1.55E+08 | 1.55E+08 | progesterone immunomodulatory binding factor 1                                        | 0.202 |
| 1 | 1.62E+08 | 1.62E+08 | tudor domain-containing protein 3                                                     | 0.230 |
| 1 | 1.65E+08 | 1.65E+08 | ETS-related transcription factor Elf-1                                                | 0.261 |
| 1 | 1.65E+08 | 1.65E+08 | WW domain-binding protein 4                                                           | 0.261 |
| 1 | 1.65E+08 | 1.65E+08 | N(alpha)-acetyltransferase 16, NatA auxiliary subunit                                 | 0.261 |
| 1 | 1.65E+08 | 1.65E+08 | regulator of cell cycle                                                               | 0.261 |
| 1 | 1.65E+08 | 1.65E+08 | von Willebrand factor A domain containing 8                                           | 0.261 |
| 1 | 1.66E+08 | 1.66E+08 | diacylglycerol kinase, eta                                                            | 0.261 |
| 1 | 1.68E+08 | 1.68E+08 | esterase D                                                                            | 0.215 |
| 1 | 1.68E+08 | 1.68E+08 | 5-hydroxytryptamine (serotonin) receptor 2A, G protein-coupled                        | 0.215 |
| 1 | 1.68E+08 | 1.68E+08 | succinate-CoA ligase, ADP-forming, beta subunit                                       | 0.215 |
| 1 | 1.68E+08 | 1.68E+08 | integral membrane protein 2B                                                          | 0.215 |
| 1 | 1.68E+08 | 1.68E+08 | retinoblastoma-associated protein                                                     | 0.215 |
| 1 | 1.68E+08 | 1.68E+08 | regulator of chromosome condensation (RCC1) and BTB (POZ) domain containing protein 2 | 0.215 |

|   |          |          |                                                                                     |       |
|---|----------|----------|-------------------------------------------------------------------------------------|-------|
| 1 | 1.68E+08 | 1.68E+08 | fibronectin type-III domain-containing protein 3a                                   | 0.215 |
| 1 | 1.68E+08 | 1.68E+08 | motilin receptor                                                                    | 0.215 |
| 1 | 1.68E+08 | 1.69E+08 | calcium binding protein 39-like                                                     | 0.215 |
| 1 | 1.74E+08 | 1.74E+08 | sister chromatid cohesion protein PDS5 homolog B                                    | 0.243 |
| 1 | 1.74E+08 | 1.74E+08 | phosphonoformate immuno-associated protein 5                                        | 0.243 |
| 1 | 1.74E+08 | 1.74E+08 | breast cancer 2, early onset                                                        | 0.243 |
| 1 | 1.74E+08 | 1.74E+08 | ZAR1-like protein                                                                   | 0.243 |
| 1 | 1.74E+08 | 1.74E+08 | furry homolog (Drosophila)                                                          | 0.243 |
| 1 | 1.77E+08 | 1.77E+08 | spastic ataxia of Charlevoix-Saguenay (sacsin)                                      | 0.225 |
| 1 | 1.78E+08 | 1.78E+08 | glia-activating factor                                                              | 0.225 |
| 1 | 1.78E+08 | 1.78E+08 | Paraspeckle component 1                                                             | 0.223 |
| 1 | 1.78E+08 | 1.78E+08 | M-phase phosphoprotein 8                                                            | 0.223 |
| 1 | 1.79E+08 | 1.79E+08 | ring finger protein 17                                                              | 0.223 |
| 1 | 1.8E+08  | 1.8E+08  | serine-protein kinase ATM                                                           | 0.207 |
| 1 | 1.8E+08  | 1.8E+08  | acetyl-CoA acetyltransferase 1                                                      | 0.207 |
| 1 | 1.8E+08  | 1.8E+08  | cullin 5                                                                            | 0.207 |
| 1 | 1.82E+08 | 1.82E+08 | transient receptor potential cation channel, subfamily C, member 6                  | 0.202 |
| 1 | 1.84E+08 | 1.84E+08 | Myotubularin-related protein 2                                                      | 0.226 |
| 1 | 1.93E+08 | 1.93E+08 | erythroblast NAD(P)(+)-arginine ADP-ribosyltransferase precursor                    | 0.195 |
| 1 | 1.94E+08 | 1.94E+08 | glycerophosphodiester phosphodiesterase domain-containing protein 5                 | 0.196 |
| 2 | 13068736 | 13498548 | partitioning defective 3 homolog                                                    | 0.234 |
| 2 | 13816140 | 13922505 | neuropilin-1 precursor                                                              | 0.234 |
| 2 | 13975831 | 14017232 | integrin beta-1 precursor                                                           | 0.234 |
| 2 | 13771061 | 13771230 | TUC338                                                                              | 0.234 |
| 2 | 14597995 | 14657468 | supervillin                                                                         | 0.209 |
| 2 | 14932503 | 14950908 | mitogen-activated protein kinase kinase kinase 8                                    | 0.209 |
| 2 | 15410320 | 15499606 | membrane protein, palmitoylated 7 (MAGUK p55 subfamily member 7)                    | 0.201 |
| 2 | 18960948 | 18977002 | ADP-ribosylation factor-like 5B                                                     | 0.262 |
| 2 | 19567820 | 19575886 | protein tyrosine phosphatase-like (proline instead of catalytic arginine), member A | 0.262 |
| 2 | 19614633 | 19653024 | alpha-2,8-sialyltransferase 8F                                                      | 0.262 |

|   |          |          |                                                                   |       |
|---|----------|----------|-------------------------------------------------------------------|-------|
| 2 | 19677910 | 19684966 | vimentin                                                          | 0.262 |
| 2 | 19737380 | 19876287 | cubilin (intrinsic factor-cobalamin receptor)                     | 0.262 |
| 2 | 19881822 | 19979217 | ras suppressor protein 1                                          | 0.262 |
| 2 | 26168484 | 26327087 | PHD finger protein 14                                             | 0.252 |
| 2 | 31286666 | 31393727 | Insulin-like growth factor 2 mRNA-binding protein 3               | 0.203 |
| 2 | 41036173 | 41058663 | Cytoplasmic dynein 1 light intermediate chain 1                   | 0.251 |
| 2 | 41080291 | 41109486 | CCR4-NOT transcription complex subunit 10                         | 0.251 |
| 2 | 41117521 | 41127915 | E3 ubiquitin-protein ligase TRIM71                                | 0.251 |
| 2 | 45255770 | 45389575 | cytoplasmic linker associated protein 2                           | 0.210 |
| 2 | 50484818 | 50543299 | cyclin-dependent kinase 13                                        | 0.205 |
| 2 | 50564486 | 50571264 | M-phase specific PLK1 interacting protein                         | 0.205 |
| 2 | 66581522 | 66713653 | exocyst complex component 2                                       | 0.200 |
| 2 | 67868597 | 67888199 | vacuolar protein sorting-associated protein 4B                    | 0.194 |
| 2 | 67898884 | 67917107 | 3-ketodihydrosphingosine reductase                                | 0.194 |
| 2 | 79163255 | 79192329 | 5-methyltetrahydrofolate-homocysteine methyltransferase reductase | 0.315 |
| 2 | 79193761 | 79203732 | FAST kinase domains 3                                             | 0.315 |
| 2 | 79220949 | 79424359 | adenylate cyclase 2 (brain)                                       | 0.315 |
| 2 | 81014599 | 81124708 | cordon-bleu WH2 repeat protein                                    | 0.216 |
| 2 | 83099424 | 83462516 | formin homology 2 domain containing 3                             | 0.235 |
| 2 | 83451751 | 83451909 | TUC338                                                            | 0.235 |
| 2 | 86624614 | 86631727 | iroquois-class homeodomain protein IRX-2                          | 0.253 |
| 2 | 88558023 | 88560120 | protein FAM206A                                                   | 0.220 |
| 2 | 1.03E+08 | 1.03E+08 | RIO kinase 3                                                      | 0.220 |
| 2 | 1.03E+08 | 1.03E+08 | Niemann-Pick disease, type C1                                     | 0.220 |
| 2 | 1.17E+08 | 1.17E+08 | telomeric repeat-binding factor 1                                 | 0.198 |
| 2 | 1.23E+08 | 1.23E+08 | cyclic nucleotide gated channel beta 3                            | 0.196 |
| 2 | 1.23E+08 | 1.24E+08 | matrix metalloproteinase-16                                       | 0.200 |
| 2 | 1.29E+08 | 1.3E+08  | regulating synaptic membrane exocytosis 2                         | 0.229 |
| 2 | 1.3E+08  | 1.3E+08  | low density lipoprotein receptor-related protein 12               | 0.229 |
| 2 | 1.36E+08 | 1.36E+08 | sterile alpha motif domain containing 12                          | 0.212 |

|   |          |          |                                                                                       |       |
|---|----------|----------|---------------------------------------------------------------------------------------|-------|
| 2 | 1.36E+08 | 1.36E+08 | tumor necrosis factor receptor superfamily member 11B precursor                       | 0.212 |
| 2 | 1.36E+08 | 1.36E+08 | Collectin-10                                                                          | 0.212 |
| 2 | 1.36E+08 | 1.36E+08 | protein MAL2                                                                          | 0.212 |
| 2 | 1.36E+08 | 1.36E+08 | protein NOV precursor                                                                 | 0.212 |
| 2 | 1.36E+08 | 1.36E+08 | ectonucleotide pyrophosphatase/phosphodiesterase family member 2                      | 0.212 |
| 2 | 1.36E+08 | 1.36E+08 | TAF2 RNA polymerase II, TATA box binding protein (TBP)-associated factor, 150kDa      | 0.212 |
| 2 | 1.37E+08 | 1.37E+08 | hyaluronan synthase 2                                                                 | 0.224 |
| 3 | 6450555  | 7094776  | neurexin-1-alpha isoform 1 precursor                                                  | 0.256 |
| 3 | 7268194  | 7268297  | U6 spliceosomal RNA                                                                   | 0.256 |
| 3 | 9521292  | 9539167  | protein pellino homolog 1                                                             | 0.204 |
| 3 | 14702016 | 14714699 | D-tyrosyl-tRNA(Tyr) deacylase 1                                                       | 0.217 |
| 3 | 14716777 | 14733389 | Protein transport protein Sec23A                                                      | 0.217 |
| 3 | 20356020 | 20391564 | centromere protein F                                                                  | 0.237 |
| 3 | 20511715 | 20538253 | N-lysine methyltransferase SMYD2                                                      | 0.237 |
| 3 | 21504436 | 21511540 | serine/threonine-protein kinase Nek2                                                  | 0.245 |
| 3 | 21605815 | 21621949 | TNF receptor-associated factor 5                                                      | 0.245 |
| 3 | 21628366 | 21650478 | REST corepressor 3                                                                    | 0.245 |
| 3 | 26287945 | 26291968 | multiple coagulation factor deficiency 2 precursor                                    | 0.226 |
| 3 | 26292215 | 26454063 | tetratricopeptide repeat protein 7A                                                   | 0.226 |
| 3 | 26488768 | 26495658 | Calmodulin                                                                            | 0.226 |
| 3 | 26566431 | 26596265 | Serine/threonine-protein phosphatase PP1-beta catalytic subunit                       | 0.226 |
| 3 | 26632539 | 26715148 | phospholipase B1                                                                      | 0.226 |
| 3 | 26737453 | 26743407 | fos-related antigen 2                                                                 | 0.226 |
| 3 | 26766303 | 26929435 | BRCA1-A complex subunit BRE                                                           | 0.226 |
| 3 | 28093815 | 28285437 | dishevelled associated activator of morphogenesis 2                                   | 0.273 |
| 3 | 28650945 | 28730284 | glucagon-like peptide 1 receptor precursor                                            | 0.273 |
| 3 | 28737986 | 28830043 | dynein, axonemal, heavy chain 8                                                       | 0.273 |
| 3 | 29519203 | 29541046 | FtsJ methyltransferase domain containing 2                                            | 0.206 |
| 3 | 29557966 | 29574363 | probable alanyl-tRNA synthetase, mitochondrial                                        | 0.206 |
| 3 | 29611732 | 29620288 | nuclear factor of kappa light polypeptide gene enhancer in B-cells inhibitor, epsilon | 0.206 |



|   |          |          |                                                                            |       |
|---|----------|----------|----------------------------------------------------------------------------|-------|
| 3 | 29630922 | 29636756 | heat shock cognate protein HSP 90-beta                                     | 0.206 |
| 3 | 34322339 | 34455636 | v-akt murine thymoma viral oncogene homolog 3                              | 0.198 |
| 3 | 34464087 | 34563969 | serologically defined colon cancer antigen 8                               | 0.198 |
| 3 | 36498791 | 36661068 | ryanodine receptor 2 (cardiac)                                             | 0.210 |
| 3 | 41393868 | 41474285 | myeloid/lymphoid or mixed-lineage leukemia (trithorax homolog, Drosophila) | 0.275 |
| 3 | 41687479 | 41708127 | unc-93 homolog A (C. elegans)                                              | 0.275 |
| 3 | 41711697 | 41713292 | tubulin tyrosine ligase-like family, member 2                              | 0.275 |
| 3 | 41759132 | 41766064 | C-C chemokine receptor type 6                                              | 0.275 |
| 3 | 41783071 | 41803951 | FGFR1 oncogene partner                                                     | 0.275 |
| 3 | 41810099 | 41831299 | ribonuclease T2 precursor                                                  | 0.275 |
| 3 | 41958446 | 42114412 | ribosomal protein S6 kinase, 90kDa, polypeptide 2                          | 0.275 |
| 3 | 42131326 | 42141404 | brain protein 44-like protein                                              | 0.275 |
| 3 | 42233586 | 42241528 | brachyury protein                                                          | 0.275 |
| 3 | 42463951 | 42626252 | phosphodiesterase 10A                                                      | 0.275 |
| 3 | 43765827 | 44445298 | parkinson protein 2, E3 ubiquitin protein ligase (parkin)                  | 0.200 |
| 3 | 45215648 | 45566922 | utrophin                                                                   | 0.217 |
| 3 | 45769623 | 45811385 | epilepsy, progressive myoclonus type 2A, Lafora disease (laforin)          | 0.217 |
| 3 | 45868769 | 45921436 | SNF2 histone linker PHD RING helicase, E3 ubiquitin protein ligase         | 0.217 |
| 3 | 45937157 | 46118743 | Glutamate receptor metabotropic 1 isoform f transcript variant 1           | 0.217 |
| 3 | 46182574 | 46256838 | androglobin                                                                | 0.217 |
| 3 | 46388675 | 46489008 | syntaxin binding protein 5 (tomosyn)                                       | 0.217 |
| 3 | 46522593 | 46647011 | sterile alpha motif domain containing 5                                    | 0.217 |
| 3 | 47394890 | 47423136 | peptidylprolyl isomerase (cyclophilin)-like 4                              | 0.220 |
| 3 | 47425648 | 47442269 | uncharacterized protein C6orf72 homolog precursor                          | 0.220 |
| 3 | 47446107 | 47459848 | Katanin p60 ATPase-containing subunit A1                                   | 0.220 |
| 3 | 48276571 | 48431441 | estrogen receptor                                                          | 0.216 |
| 3 | 48447032 | 48720659 | spectrin repeat containing, nuclear envelope 1                             | 0.216 |
| 3 | 48776284 | 48795822 | VIP peptides isoform 2 preproprotein                                       | 0.216 |
| 3 | 48910153 | 48981998 | Regulator of G-protein signaling 17                                        | 0.216 |
| 3 | 50465764 | 50754522 | AT rich interactive domain 1B (SWI1-like)                                  | 0.243 |

|   |          |          |                                                                     |       |
|---|----------|----------|---------------------------------------------------------------------|-------|
| 3 | 73318964 | 73462488 | Ephrin type-A receptor 7                                            | 0.236 |
| 3 | 75787755 | 75824704 | origin recognition complex subunit 3                                | 0.203 |
| 3 | 75858402 | 75874162 | CMP-sialic acid transporter                                         | 0.203 |
| 3 | 79966253 | 79995357 | SUMO1/sentrin specific peptidase 6                                  | 0.211 |
| 3 | 80071280 | 80164378 | filamin A interacting protein 1                                     | 0.211 |
| 3 | 80180051 | 80193545 | cell cycle control protein 50A                                      | 0.211 |
| 3 | 80197965 | 80201301 | cytochrome c oxidase subunit 7A2, mitochondrial                     | 0.211 |
| 3 | 80212182 | 80312375 | collagen alpha-1(XII) chain precursor                               | 0.211 |
| 3 | 81337238 | 81638081 | regulating synaptic membrane exocytosis 1                           | 0.195 |
| 3 | 86249530 | 86545594 | dystonin                                                            | 0.227 |
| 3 | 86766922 | 86825286 | bone morphogenetic protein 5 precursor                              | 0.227 |
| 3 | 88949756 | 89752149 | CUB and Sushi multiple domains 1                                    | 0.228 |
| 3 | 96291158 | 96342936 | Hippocalcin-like protein 1                                          | 0.268 |
| 3 | 96350213 | 96356450 | ornithine decarboxylase                                             | 0.268 |
| 3 | 96480139 | 96496443 | ATPase, H <sup>+</sup> transporting, lysosomal 42kDa, V1 subunit C2 | 0.268 |
| 3 | 96729661 | 96737554 | PQ loop repeat containing 3                                         | 0.268 |
| 3 | 96746492 | 96802174 | Rho-associated, coiled-coil containing protein kinase 2             | 0.268 |
| 3 | 96852537 | 96861622 | transcription factor E2F6                                           | 0.268 |
| 3 | 96906122 | 96965158 | growth regulation by estrogen in breast cancer 1                    | 0.268 |
| 3 | 96971362 | 97044067 | Lipin 1; Uncharacterized protein                                    | 0.268 |
| 3 | 97427885 | 97448910 | tribbles homolog 2                                                  | 0.268 |
| 3 | 98343307 | 98504175 | neuroblastoma amplified sequence                                    | 0.268 |
| 3 | 98505120 | 98526381 | ATP-dependent RNA helicase DDX1                                     | 0.268 |
| 3 | 98778414 | 98780948 | N-myc proto-oncogene protein                                        | 0.268 |
| 3 | 99136709 | 99173961 | Protein FAM49A                                                      | 0.268 |
| 3 | 1.04E+08 | 1.05E+08 | putative Polycomb group protein ASXL2                               | 0.212 |
| 3 | 1.09E+08 | 1.09E+08 | cytochrome P450, family 39, subfamily A, polypeptide 1              | 0.216 |
| 3 | 1.09E+08 | 1.09E+08 | tudor domain containing 6                                           | 0.216 |
| 3 | 1.09E+08 | 1.09E+08 | platelet-activating factor acetylhydrolase                          | 0.216 |
| 3 | 1.1E+08  | 1.1E+08  | G protein-coupled receptor 116                                      | 0.216 |

|   |          |          |                                                                                         |       |
|---|----------|----------|-----------------------------------------------------------------------------------------|-------|
| 3 | 1.1E+08  | 1.1E+08  | tumor necrosis factor receptor superfamily member 21 precursor                          | 0.216 |
| 3 | 1.1E+08  | 1.1E+08  | CD2-associated protein                                                                  | 0.216 |
| 3 | 1.09E+08 | 1.09E+08 | taste receptor type 2 member 7                                                          | 0.216 |
| 4 | 10450054 | 10450218 | TUC338                                                                                  | 0.217 |
| 4 | 17161323 | 17256387 | Nik related kinase                                                                      | 0.214 |
| 4 | 22824459 | 22828895 | neuropeptide Y receptor type 1                                                          | 0.196 |
| 4 | 34202352 | 34367249 | Fraser syndrome 1                                                                       | 0.299 |
| 4 | 34415667 | 34425383 | CCR4-NOT transcription complex, subunit 6-like                                          | 0.299 |
| 4 | 34433792 | 34435418 | Chemokine                                                                               | 0.299 |
| 4 | 34460742 | 34467515 | cyclin G2                                                                               | 0.299 |
| 4 | 34487202 | 34488289 | PIGY upstream reading frame                                                             | 0.299 |
| 4 | 34496081 | 34542198 | probable E3 ubiquitin-protein ligase HERC3                                              | 0.299 |
| 4 | 34542533 | 34656257 | family with sequence similarity 13, member A                                            | 0.299 |
| 4 | 34818548 | 34885635 | alpha-synuclein                                                                         | 0.299 |
| 4 | 34906759 | 34949844 | multimerin 1                                                                            | 0.299 |
| 4 | 34693911 | 34696151 | GPRIN family member 3                                                                   | 0.299 |
| 4 | 37847835 | 37861897 | aminoacyl tRNA synthetase complex-interacting multifunctional protein 1                 | 0.227 |
| 4 | 37878922 | 37971616 | TBC domain-containing protein kinase-like protein                                       | 0.227 |
| 4 | 37998529 | 38044094 | nephronectin                                                                            | 0.227 |
| 4 | 38124523 | 38140681 | integrator complex subunit 12                                                           | 0.227 |
| 4 | 38146410 | 38172500 | Rho guanine nucleotide exchange factor (GEF) 38                                         | 0.227 |
| 4 | 38883037 | 38919985 | long-chain-fatty-acid--CoA ligase 1                                                     | 0.209 |
| 4 | 38921548 | 38931422 | centromere protein U                                                                    | 0.209 |
| 4 | 42203702 | 42635333 | UDP-N-acetyl-alpha-D-galactosamine:polypeptide N-acetylgalactosaminyltransferase-like 6 | 0.224 |
| 4 | 53397253 | 53412498 | annexin A5                                                                              | 0.202 |
| 4 | 53488372 | 53510295 | pyroglutamylated RFamide peptide receptor                                               | 0.202 |
| 4 | 53544222 | 53582180 | TNFAIP3 interacting protein 3                                                           | 0.202 |
| 4 | 53644937 | 53729832 | PR domain containing 5                                                                  | 0.202 |
| 4 | 53693495 | 53693674 | TUC338                                                                                  | 0.202 |
| 4 | 59910288 | 60049717 | protein phosphatase 3, catalytic subunit, alpha isozyme                                 | 0.218 |

|   |          |          |                                                              |       |
|---|----------|----------|--------------------------------------------------------------|-------|
| 4 | 61227165 | 61276241 | Melatonin receptor type 1A                                   | 0.260 |
| 4 | 63228829 | 63342046 | tumor suppressor candidate 3                                 | 0.230 |
| 4 | 63469831 | 63819243 | sarcoglycan, zeta                                            | 0.230 |
| 4 | 68691120 | 68764869 | sister chromatid cohesion protein PDS5 homolog A             | 0.226 |
| 4 | 69522430 | 69572232 | KIAA1239                                                     | 0.213 |
| 4 | 69781392 | 69796531 | death domain containing 1                                    | 0.213 |
| 4 | 69799893 | 69923066 | ArfGAP with RhoGAP domain, ankyrin repeat and PH domain 2    | 0.213 |
| 4 | 75401346 | 75452145 | Ligand-dependent nuclear receptor corepressor-like protein   | 0.196 |
| 4 | 75480300 | 75503309 | non-SMC condensin I complex, subunit G                       | 0.196 |
| 4 | 81699702 | 81774162 | huntingtin                                                   | 0.226 |
| 4 | 81780294 | 81810730 | G protein-coupled receptor kinase 4                          | 0.226 |
| 4 | 81861191 | 81918087 | alpha-adducin                                                | 0.226 |
| 4 | 81924388 | 81959922 | SH3 domain-binding protein 2                                 | 0.226 |
| 4 | 82006422 | 82013592 | TNFAIP3-interacting protein 2                                | 0.226 |
| 4 | 82049672 | 82097810 | family with sequence similarity 193, member A                | 0.226 |
| 4 | 81902213 | 81902370 | U1 spliceosomal RNA                                          | 0.226 |
| 5 | 6774141  | 6845804  | PTPRF interacting protein, binding protein 2 (liprin beta 2) | 0.224 |
| 5 | 6836663  | 6856264  | NADH-cytochrome b5 reductase 2                               | 0.224 |
| 5 | 8301559  | 8330255  | murine retrovirus integration site 1 homolog                 | 0.229 |
| 5 | 8332204  | 8342809  | lymphatic vessel endothelial hyaluronic acid receptor 1      | 0.229 |
| 5 | 8344527  | 8355772  | RING finger protein 141                                      | 0.229 |
| 5 | 8361714  | 8387323  | AMP deaminase 3                                              | 0.229 |
| 5 | 8868538  | 8920092  | DENN/MADD domain containing 5A                               | 0.198 |
| 5 | 8927057  | 8961764  | signal peptide, CUB domain, EGF-like 2                       | 0.198 |
| 5 | 12238926 | 12267404 | receptor-type tyrosine-protein phosphatase eta               | 0.234 |
| 5 | 22080490 | 22083151 | family with sequence similarity 180, member B                | 0.238 |
| 5 | 22088781 | 22093418 | NADH dehydrogenase                                           | 0.238 |
| 5 | 22095231 | 22100669 | kelch repeat and BTB domain-containing protein 4             | 0.238 |
| 5 | 22100815 | 22102871 | protein tyrosine phosphatase, mitochondrial 1                | 0.238 |
| 5 | 22103005 | 22150651 | CUGBP Elav-like family member 1                              | 0.238 |

|   |          |          |                                                                        |       |
|---|----------|----------|------------------------------------------------------------------------|-------|
| 5 | 22076422 | 22077558 | C1q and tumor necrosis factor related protein 4                        | 0.238 |
| 5 | 22947434 | 22948426 | midkine precursor                                                      | 0.218 |
| 5 | 22949353 | 22992334 | diacylglycerol kinase zeta                                             | 0.218 |
| 5 | 22944471 | 22945943 | muscarinic acetylcholine receptor M4                                   | 0.218 |
| 5 | 23959882 | 23993960 | inositol-trisphosphate 3-kinase A                                      | 0.257 |
| 5 | 24139477 | 24176035 | RNA polymerase II associated protein 1                                 | 0.257 |
| 5 | 24215769 | 24250023 | tyrosine-protein kinase receptor TYRO3 precursor                       | 0.257 |
| 5 | 24268925 | 24313980 | MGA, MAX dimerization protein                                          | 0.257 |
| 5 | 24330575 | 24419530 | mitogen-activated protein kinase binding protein 1                     | 0.257 |
| 5 | 24424421 | 24430668 | jmjC domain-containing protein 7                                       | 0.257 |
| 5 | 24487476 | 24583608 | spectrin, beta, non-erythrocytic 5                                     | 0.257 |
| 5 | 24595101 | 24618120 | EH-domain containing 4                                                 | 0.257 |
| 5 | 24865079 | 24890722 | vam6/Vps39-like protein                                                | 0.257 |
| 5 | 24915661 | 24936853 | neutral alpha-glucosidase C                                            | 0.257 |
| 5 | 24937025 | 24960748 | calpain-3                                                              | 0.257 |
| 5 | 25000359 | 25015379 | synaptosomal-associated protein 23                                     | 0.257 |
| 5 | 26489235 | 26559259 | pecanex homolog (Drosophila)                                           | 0.221 |
| 5 | 33101816 | 33216460 | serine/threonine-protein kinase D1                                     | 0.201 |
| 5 | 36015953 | 36247167 | solute carrier family 25 (mitochondrial oxoadipate carrier), member 21 | 0.217 |
| 5 | 36843282 | 36865890 | Protein transport protein Sec23A                                       | 0.217 |
| 5 | 36871372 | 36880109 | survival of motor neuron protein-interacting protein 1                 | 0.217 |
| 5 | 36880151 | 36883970 | trafficking protein particle complex 6B                                | 0.217 |
| 5 | 36884690 | 36894010 | pinin, desmosome associated protein                                    | 0.217 |
| 5 | 36989049 | 37003244 | Ectonucleoside triphosphate diphosphohydrolase 5                       | 0.217 |
| 5 | 37025663 | 37064969 | Protein lin-52 homolog                                                 | 0.217 |
| 5 | 36632383 | 36633663 | somatostatin receptor type 1                                           | 0.217 |
| 5 | 42319730 | 42344911 | spermatogenesis associated 7                                           | 0.200 |
| 5 | 42427791 | 42521303 | echinoderm microtubule associated protein like 5                       | 0.200 |
| 5 | 43694395 | 43711430 | tandem C2 domains, nuclear                                             | 0.218 |
| 5 | 43832919 | 43844552 | Ataxin-3                                                               | 0.218 |

|   |          |          |                                                                        |       |
|---|----------|----------|------------------------------------------------------------------------|-------|
| 5 | 43845120 | 43847133 | NADH dehydrogenase                                                     | 0.218 |
| 5 | 43847339 | 43860849 | cleavage and polyadenylation specificity factor subunit 2              | 0.218 |
| 5 | 45876530 | 45909816 | serine/threonine-protein kinase VRK1                                   | 0.284 |
| 5 | 47783078 | 47906765 | Histone-lysine N-methyltransferase setd3                               | 0.281 |
| 5 | 47907119 | 47919817 | cyclin-K                                                               | 0.281 |
| 5 | 48046014 | 48063255 | HHIP-like 1                                                            | 0.281 |
| 5 | 48067831 | 48083159 | cholesterol 24-hydroxylase                                             | 0.281 |
| 5 | 48159648 | 48241305 | echinoderm microtubule associated protein like 1                       | 0.281 |
| 5 | 48312771 | 48378821 | ena/VASP-like protein                                                  | 0.281 |
| 5 | 48418077 | 48431424 | transcriptional repressor protein YY1                                  | 0.281 |
| 5 | 48456828 | 48465791 | solute carrier family 25, member 47                                    | 0.281 |
| 5 | 48490625 | 48546715 | WD repeat domain 25                                                    | 0.281 |
| 5 | 48566385 | 48715173 | brain-enriched guanylate kinase-associated                             | 0.281 |
| 5 | 48844046 | 48853652 | protein delta homolog 1 precursor                                      | 0.281 |
| 5 | 53874253 | 53882060 | small nuclear RNA activating complex, polypeptide 1, 43kDa             | 0.220 |
| 5 | 53884053 | 53914606 | hypoxia-inducible factor 1-alpha                                       | 0.220 |
| 6 | 11556862 | 11568617 | Histone H2A                                                            | 0.217 |
| 6 | 20754954 | 20843012 | DNA nucleotidylexotransferase                                          | 0.266 |
| 6 | 21051932 | 21053666 | VENT homeobox                                                          | 0.266 |
| 6 | 21074071 | 21135637 | kinase non-catalytic C-lobe domain (KIND) containing 1                 | 0.266 |
| 6 | 27087946 | 27102495 | DNA cross-link repair 1A protein                                       | 0.202 |
| 6 | 27103400 | 27134851 | NHL repeat-containing protein 2                                        | 0.202 |
| 6 | 31243849 | 31257991 | G protein-coupled receptor 26                                          | 0.249 |
| 6 | 31382330 | 31425438 | carbohydrate (N-acetylgalactosamine 4-sulfate 6-O) sulfotransferase 15 | 0.249 |
| 6 | 31539142 | 31551526 | ornithine aminotransferase, mitochondrial                              | 0.249 |
| 6 | 31560638 | 31561609 | NK1 homeobox 2                                                         | 0.249 |
| 6 | 31636707 | 31661235 | family with sequence similarity 53, member B                           | 0.249 |
| 6 | 31686516 | 31702105 | BRISC complex subunit Abro1                                            | 0.249 |
| 7 | 5508762  | 5538667  | transient receptor potential cation channel subfamily M member 8       | 0.212 |
| 7 | 5546056  | 5553781  | secreted phosphoprotein 24                                             | 0.212 |

|   |          |          |                                                                                |       |
|---|----------|----------|--------------------------------------------------------------------------------|-------|
| 7 | 5654088  | 5654666  | ADP-ribosylation factor-like 4C                                                | 0.212 |
| 7 | 10900361 | 10919427 | CASP8 and FADD-like apoptosis regulator                                        | 0.200 |
| 7 | 10924385 | 10932701 | caspase 10, apoptosis-related cysteine peptidase                               | 0.200 |
| 7 | 10936137 | 10944290 | caspase 18                                                                     | 0.200 |
| 7 | 10949123 | 10955503 | caspase-8                                                                      | 0.200 |
| 7 | 10990622 | 10997507 | STE20-related kinase adaptor beta                                              | 0.200 |
| 7 | 11017902 | 11042872 | membrane protein, palmitoylated 4 (MAGUK p55 subfamily member 4)               | 0.200 |
| 7 | 11084221 | 11117761 | cyclin-dependent kinase 15                                                     | 0.200 |
| 7 | 11182131 | 11185182 | frizzled-7 precursor                                                           | 0.200 |
| 7 | 16313906 | 16361739 | WAS/WASL-interacting protein family member 1                                   | 0.206 |
| 7 | 17214612 | 17252865 | integrin alpha-6 precursor                                                     | 0.223 |
| 7 | 18074706 | 18082768 | Sjogren syndrome antigen B (autoantigen La) isoform 1                          | 0.203 |
| 7 | 18115845 | 18140425 | peptidylprolyl isomerase G (cyclophilin G)                                     | 0.203 |
| 7 | 18171747 | 18181640 | Bardet-Biedl syndrome 5 protein                                                | 0.203 |
| 7 | 18254209 | 18342504 | low density lipoprotein receptor-related protein 2                             | 0.203 |
| 7 | 18366761 | 18411191 | ATP-binding cassette, sub-family B (MDR/TAP), member 11                        | 0.203 |
| 7 | 18583602 | 18668725 | serine threonine kinase 39                                                     | 0.203 |
| 7 | 26674970 | 26859021 | myosin light chain kinase, smooth muscle                                       | 0.207 |
| 7 | 30459507 | 30701723 | thrombospondin, type I, domain containing 7B                                   | 0.209 |
| 7 | 31350097 | 31932431 | low density lipoprotein receptor-related protein 1                             | 0.195 |
| 8 | 822750   | 960453   | netrin G1                                                                      | 0.247 |
| 8 | 987129   | 1134223  | guanine nucleotide exchange factor VAV3                                        | 0.247 |
| 8 | 1182030  | 1195519  | solute carrier family 25 (mitochondrial carrier; phosphate carrier), member 24 | 0.247 |
| 8 | 1233367  | 1239025  | Small RNA 2'-O-methyltransferase                                               | 0.247 |
| 8 | 1264534  | 1289487  | syntaxin-binding protein 3                                                     | 0.247 |
| 8 | 1303357  | 1327945  | G-protein signaling modulator 2                                                | 0.247 |
| 8 | 1362791  | 1578757  | calmodulin regulated spectrin-associated protein family, member 2              | 0.247 |
| 8 | 1448262  | 1477082  | kinesin family member 14                                                       | 0.247 |
| 8 | 1585806  | 1668861  | nuclear receptor subfamily 5 group A member 2                                  | 0.247 |
| 8 | 2019148  | 2076592  | receptor-type tyrosine-protein phosphatase C precursor                         | 0.247 |

|   |          |          |                                                                                             |       |
|---|----------|----------|---------------------------------------------------------------------------------------------|-------|
| 8 | 3981797  | 3985419  | cysteine-rich protein 2                                                                     | 0.204 |
| 8 | 3995482  | 4052393  | metastasis-associated protein MTA1                                                          | 0.204 |
| 8 | 4130593  | 4139427  | Vesicle-trafficking protein SEC22b                                                          | 0.204 |
| 8 | 4145809  | 4225658  | neurogenic locus notch homolog protein 2 precursor                                          | 0.204 |
| 8 | 4229378  | 4233158  | 3-hydroxy-3-methylglutaryl-CoA synthase 2 (mitochondrial)                                   | 0.204 |
| 8 | 4233645  | 4236981  | phosphoglycerate dehydrogenase                                                              | 0.204 |
| 8 | 4241111  | 4268884  | phosphodiesterase 4D interacting protein                                                    | 0.204 |
| 8 | 4269072  | 4275923  | 5'-AMP-activated protein kinase subunit beta-2                                              | 0.204 |
| 8 | 4284025  | 4287967  | phosphatidic acid phosphatase type 2 domain containing 2                                    | 0.204 |
| 8 | 4296031  | 4302926  | peroxiredoxin-6                                                                             | 0.204 |
| 8 | 4303065  | 4316854  | transcriptional adaptor 1 (HFI1 homolog, yeast)-like                                        | 0.204 |
| 8 | 5890359  | 5957040  | acyl-CoA binding domain containing 6                                                        | 0.221 |
| 8 | 10722448 | 10772172 | CDC14 cell division cycle 14 homolog A                                                      | 0.243 |
| 8 | 10783844 | 10785051 | G protein-coupled receptor 88                                                               | 0.243 |
| 8 | 10837704 | 10851191 | RNA 3'-terminal phosphate cyclase                                                           | 0.243 |
| 8 | 10851933 | 10864943 | lipoamide acyltransferase component of branched-chain alpha-keto acid dehydrogenase complex | 0.243 |
| 8 | 10883574 | 10895986 | spindle assembly abnormal protein 6 homolog                                                 | 0.243 |
| 8 | 10918535 | 10935926 | UDP-N-acetylglucosamine transporter                                                         | 0.243 |
| 8 | 11017203 | 11051067 | amylo-alpha-1, 6-glucosidase, 4-alpha-glucanotransferase                                    | 0.243 |
| 8 | 11071107 | 11128777 | palmdelphin                                                                                 | 0.243 |
| 8 | 14118086 | 14145849 | protein kinase N2                                                                           | 0.271 |
| 8 | 27103615 | 27128984 | tyrosine-protein kinase JAK1                                                                | 0.200 |
| 9 | 1075334  | 1241140  | Heparan-sulfate 6-O-sulfotransferase 1                                                      | 0.209 |
| 9 | 4978758  | 5005060  | period circadian protein homolog 2                                                          | 0.238 |
| 9 | 5092108  | 5175814  | phosphatidylinositol-4,5-bisphosphate 3-kinase catalytic subunit beta isoform               | 0.238 |
| 9 | 5411909  | 5436836  | retinol binding protein 1, cellular                                                         | 0.238 |
| 9 | 5566977  | 5861817  | calsyntenin 2                                                                               | 0.238 |
| 9 | 5200075  | 5200992  | forkhead box protein L2                                                                     | 0.238 |
| 9 | 12596242 | 12623350 | ATPase type 13A5                                                                            | 0.218 |
| 9 | 12628993 | 12700392 | zonadhesin                                                                                  | 0.218 |



|   |          |          |                                                         |       |
|---|----------|----------|---------------------------------------------------------|-------|
| 9 | 12741369 | 12791772 | Mab-21 domain containing 2                              | 0.218 |
| 9 | 12913816 | 12999648 | fibroblast growth factor 12                             | 0.218 |
| 9 | 13178354 | 13185135 | urotensin-2B precursor                                  | 0.218 |
| 9 | 13186472 | 13199826 | osteocrin precursor                                     | 0.218 |
| 9 | 13337288 | 13367409 | interleukin 1 receptor accessory protein                | 0.218 |
| 9 | 13417660 | 13427011 | claudin-1                                               | 0.218 |
| 9 | 13458582 | 13513540 | prolyl 3-hydroxylase 2 precursor                        | 0.218 |
| 9 | 13522136 | 13675334 | tumor protein 63                                        | 0.218 |
| 9 | 16565596 | 16587667 | fragile X mental retardation syndrome-related protein 1 | 0.236 |
| 9 | 16663283 | 16672397 | tetratricopeptide repeat protein 14                     | 0.236 |
| 9 | 16760382 | 16850020 | peroxisomal biogenesis factor 5-like                    | 0.236 |
| 9 | 16861502 | 16902461 | Ubiquitin carboxyl-terminal hydrolase 13                | 0.236 |
| 9 | 16903953 | 16907474 | NADH dehydrogenase                                      | 0.236 |
| 9 | 16911951 | 16921482 | actin-like 6A                                           | 0.236 |
| 9 | 16984938 | 17003984 | mitofusin-1                                             | 0.236 |
| 9 | 16342563 | 16343510 | Transcription factor SOX-2                              | 0.236 |
| 9 | 16352844 | 16353105 | SOX2 overlapping transcript exon 3                      | 0.236 |
| 9 | 16391649 | 16391874 | SOX2 overlapping transcript exon 1                      | 0.236 |
| 9 | 16820695 | 16820798 | U6 spliceosomal RNA                                     | 0.236 |
| 9 | 16340729 | 16340829 | SOX2 overlapping transcript exon 4                      | 0.236 |
| 9 | 18196758 | 18471834 | neuroligin-1                                            | 0.194 |
| 9 | 20419761 | 20464371 | cholinesterase precursor                                | 0.198 |
| 9 | 23105804 | 23118255 | eukaryotic translation initiation factor 2A             | 0.243 |
| 9 | 23119142 | 23147022 | TSC22 domain family, member 2                           | 0.243 |
| 9 | 23218003 | 23220395 | profilin-2                                              | 0.243 |
| 9 | 23226057 | 23254253 | E3 ubiquitin-protein ligase RNF13                       | 0.243 |
| 9 | 23254409 | 23259438 | COMM domain containing 2                                | 0.243 |
| 9 | 23264511 | 23304671 | WW domain containing transcription regulator 1          | 0.243 |
| 9 | 23359472 | 23377519 | ceruloplasmin (ferroxidase)                             | 0.243 |
| 9 | 23410228 | 23425241 | glycogenin-1                                            | 0.243 |

|    |          |          |                                                                          |       |
|----|----------|----------|--------------------------------------------------------------------------|-------|
| 10 | 3952464  | 4034731  | vacuolar protein sorting 13 homolog C ( <i>S. cerevisiae</i> )           | 0.196 |
| 10 | 4876780  | 4886390  | BCL2/adenovirus E1B 19kDa interacting protein 2                          | 0.237 |
| 10 | 4892733  | 4897305  | transcription initiation factor IIA subunit 2                            | 0.237 |
| 10 | 5072623  | 5098236  | Kruppel-like factor 13                                                   | 0.237 |
| 10 | 5146745  | 5227651  | transient receptor potential cation channel, subfamily M, member 1       | 0.237 |
| 10 | 5235131  | 5266963  | myotubularin related protein 10                                          | 0.237 |
| 10 | 5299493  | 5303542  | methylmalonyl CoA epimerase                                              | 0.237 |
| 10 | 5396943  | 5466890  | family with sequence similarity 189, member A1                           | 0.237 |
| 10 | 5524064  | 5593805  | tight junction protein 1                                                 | 0.237 |
| 10 | 6434758  | 6619897  | disintegrin and metalloproteinase domain-containing protein 10 precursor | 0.244 |
| 10 | 6480269  | 6521283  | lipase, hepatic                                                          | 0.244 |
| 10 | 6572777  | 6596733  | aquaporin 9                                                              | 0.244 |
| 10 | 6604818  | 6661741  | Retinal dehydrogenase 2                                                  | 0.244 |
| 10 | 6816944  | 6857906  | cingulin-like 1                                                          | 0.244 |
| 10 | 6903270  | 7058903  | transcription factor 12                                                  | 0.244 |
| 10 | 7158297  | 7164937  | meiosis-specific nuclear structural 1                                    | 0.244 |
| 10 | 7159553  | 7183472  | testis expressed 9                                                       | 0.244 |
| 10 | 7249251  | 7256715  | regulatory factor X, 7                                                   | 0.244 |
| 10 | 7266832  | 7316503  | E3 ubiquitin-protein ligase                                              | 0.244 |
| 10 | 7329784  | 7416677  | protogenin precursor                                                     | 0.244 |
| 10 | 7427934  | 7435865  | pygopus homolog 1                                                        | 0.244 |
| 10 | 7444550  | 7452475  | dyslexia susceptibility 1 candidate 1                                    | 0.244 |
| 10 | 7454665  | 7473825  | Cell cycle progression protein 1                                         | 0.244 |
| 10 | 7470471  | 7480656  | phosphatidylinositol glycan anchor biosynthesis, class B                 | 0.244 |
| 10 | 7484146  | 7513189  | ras-related protein Rab-27A                                              | 0.244 |
| 10 | 7641038  | 7759221  | unc-13 homolog C ( <i>C. elegans</i> )                                   | 0.244 |
| 10 | 7807793  | 7874460  | WD repeat domain 72                                                      | 0.244 |
| 10 | 8193075  | 8224905  | Protein FAM214A                                                          | 0.244 |
| 10 | 11740664 | 11788096 | KIAA1199                                                                 | 0.214 |
| 10 | 16601477 | 16763501 | ADAM metalloproteinase with thrombospondin type 1 motif, 17              | 0.211 |

|    |          |          |                                                                      |       |
|----|----------|----------|----------------------------------------------------------------------|-------|
| 11 | 1970808  | 2023641  | craniofacial development protein 1                                   | 0.220 |
| 11 | 10016612 | 10144234 | carbohydrate (N-acetylgalactosamine 4-0) sulfotransferase 8          | 0.241 |
| 12 | 3713196  | 4003351  | ATPase, Ca <sup>++</sup> transporting, plasma membrane 2             | 0.261 |
| 12 | 4857558  | 4878220  | peroxisome proliferator-activated receptor gamma                     | 0.204 |
| 12 | 4929821  | 4939522  | probable E3 ubiquitin-protein ligase makorin-2                       | 0.204 |
| 12 | 4943218  | 4971156  | RAF proto-oncogene serine/threonine-protein kinase                   | 0.204 |
| 12 | 5041289  | 5050563  | cellular nucleic acid-binding protein                                | 0.204 |
| 12 | 5783474  | 5867616  | fibulin 2                                                            | 0.236 |
| 12 | 6023840  | 6055635  | protein Wnt-7a                                                       | 0.236 |
| 12 | 6125099  | 6126552  | homeobox protein BarH-like 1b                                        | 0.236 |
| 12 | 6282467  | 6367527  | PHD finger protein 2                                                 | 0.236 |
| 12 | 6375304  | 6426198  | family with sequence similarity 120A                                 | 0.236 |
| 12 | 6453845  | 6563101  | WNK lysine deficient protein kinase 2                                | 0.236 |
| 12 | 6644909  | 6670629  | sushi domain containing 3                                            | 0.236 |
| 12 | 6695375  | 6799774  | FYVE, RhoGEF and PH domain containing 3                              | 0.236 |
| 12 | 6077974  | 6078065  | gga-let-7f                                                           | 0.236 |
| 12 | 6076930  | 6077032  | gga-let-7d                                                           | 0.236 |
| 12 | 6078389  | 6078478  | gga-let-7a-1                                                         | 0.236 |
| 12 | 8976730  | 9011876  | NCK interacting protein with SH3 domain                              | 0.216 |
| 12 | 13983652 | 14275283 | membrane associated guanylate kinase, WW and PDZ domain containing 1 | 0.251 |
| 12 | 15329789 | 15396454 | FERM domain containing 4B                                            | 0.199 |
| 12 | 15468612 | 15557117 | microphthalmia-associated transcription factor                       | 0.199 |
| 12 | 15571303 | 15598096 | hydroxysteroid (17-beta) dehydrogenase 14                            | 0.199 |
| 13 | 3574865  | 4046215  | slit homolog 3 protein precursor                                     | 0.222 |
| 13 | 4187413  | 4738485  | teneurin-2 isoform 1                                                 | 0.243 |
| 13 | 6399216  | 6470747  | Gamma-aminobutyric acid receptor subunit gamma-2                     | 0.215 |
| 13 | 6533385  | 6575415  | Gamma-aminobutyric acid receptor subunit alpha-1                     | 0.215 |
| 13 | 6621733  | 6646067  | Gamma-aminobutyric acid receptor subunit alpha-6                     | 0.215 |
| 13 | 8133602  | 8180065  | serine/threonine kinase 10                                           | 0.244 |
| 13 | 8254942  | 8280226  | neutralized homolog 1B (Drosophila)                                  | 0.244 |

|    |          |          |                                                              |       |
|----|----------|----------|--------------------------------------------------------------|-------|
| 13 | 8380376  | 8384733  | dual specificity protein phosphatase 1                       | 0.244 |
| 13 | 8470024  | 8474437  | 60S ribosomal protein L26                                    | 0.244 |
| 13 | 8477223  | 8481039  | V-type proton ATPase subunit e 1                             | 0.244 |
| 13 | 8535721  | 8537935  | homeobox protein Nkx-2.5                                     | 0.244 |
| 13 | 10737034 | 10764716 | IL2-inducible T-cell kinase                                  | 0.243 |
| 13 | 10778915 | 10785137 | hepatitis A virus cellular receptor 1 precursor              | 0.243 |
| 14 | 6602197  | 6621651  | leucine carboxyl methyltransferase 1                         | 0.194 |
| 14 | 8877922  | 8897487  | cytohesin 3                                                  | 0.218 |
| 14 | 10103934 | 10114456 | methyltransferase-like protein 22                            | 0.204 |
| 14 | 12090645 | 12099745 | Hemoglobin subunit pi                                        | 0.198 |
| 15 | 4855484  | 4908313  | dynein, axonemal, heavy chain 10                             | 0.269 |
| 15 | 4909039  | 4924155  | V-type proton ATPase 116 kDa subunit a isoform 2             | 0.269 |
| 15 | 4933001  | 4937788  | general transcription factor IIH, polypeptide 3, 34kDa       | 0.269 |
| 15 | 4941748  | 4948314  | ATP-dependent RNA helicase DDX55                             | 0.269 |
| 15 | 4977536  | 4979234  | small nuclear ribonucleoprotein 35kDa (U11/U12)              | 0.269 |
| 15 | 4986361  | 4990790  | SET domain containing (lysine methyltransferase) 8           | 0.269 |
| 15 | 5002524  | 5026119  | protein strawberry notch homolog 1                           | 0.269 |
| 15 | 5038370  | 5051012  | cyclin-dependent kinase 2-associated protein 1               | 0.269 |
| 15 | 5053460  | 5077681  | M-phase phosphoprotein 9                                     | 0.269 |
| 15 | 5080304  | 5188058  | phosphatidylinositol transfer protein, membrane-associated 2 | 0.269 |
| 15 | 5192449  | 5195746  | ADP-ribosylation factor-like protein 6-interacting protein 4 | 0.269 |
| 15 | 5208507  | 5219304  | ATP-binding cassette, sub-family B (MDR/TAP), member 9       | 0.269 |
| 15 | 5243010  | 5257347  | huntingtin-interacting protein 1-related protein             | 0.269 |
| 15 | 5264075  | 5270199  | Density-regulated protein                                    | 0.269 |
| 15 | 5297891  | 5339287  | Sarcoplasmic/endoplasmic reticulum calcium ATPase 2          | 0.269 |
| 15 | 5368868  | 5407536  | intraflagellar transport protein 81 homolog                  | 0.269 |
| 15 | 5407225  | 5424559  | P2X purinoceptor                                             | 0.269 |
| 15 | 5425109  | 5431053  | P2X purinoceptor 4                                           | 0.269 |
| 15 | 5446352  | 5457999  | anaphase-promoting complex subunit 5                         | 0.269 |
| 15 | 5460336  | 5468349  | E3 ubiquitin-protein ligase RNF34                            | 0.269 |

|    |         |         |                                                                  |       |
|----|---------|---------|------------------------------------------------------------------|-------|
| 15 | 5469305 | 5570414 | lysine (K)-specific demethylase 2B                               | 0.269 |
| 15 | 5574193 | 5584055 | calcium release-activated calcium channel protein 1              | 0.269 |
| 15 | 5585816 | 5594140 | MORN repeat containing 3                                         | 0.269 |
| 15 | 5612621 | 5620330 | rho-related GTP-binding protein RhoF                             | 0.269 |
| 15 | 5634231 | 5677257 | histone-lysine N-methyltransferase SETD1B                        | 0.269 |
| 15 | 5682530 | 5686156 | 4-hydroxyphenylpyruvate dioxygenase                              | 0.269 |
| 15 | 5686962 | 5689686 | 26S proteasome non-ATPase regulatory subunit 9                   | 0.269 |
| 15 | 5691074 | 5704256 | WD repeat domain 66                                              | 0.269 |
| 15 | 5749503 | 5768970 | MLX interacting protein                                          | 0.269 |
| 15 | 5810440 | 5862422 | CAP-Gly domain-containing linker protein 1                       | 0.269 |
| 15 | 5890702 | 5903184 | arginine/serine-rich coiled-coil 2                               | 0.269 |
| 15 | 5935811 | 5940908 | vacuolar protein sorting-associated protein 29                   | 0.269 |
| 15 | 5941111 | 5947675 | RAD9 homolog B ( <i>S. pombe</i> )                               | 0.269 |
| 15 | 5981119 | 5990657 | voltage-gated hydrogen channel 1                                 | 0.269 |
| 15 | 5994099 | 6009307 | serine/threonine-protein phosphatase PP1-gamma catalytic subunit | 0.269 |
| 15 | 6068672 | 6089862 | cut-like homeobox 2                                              | 0.269 |
| 15 | 6102036 | 6113781 | SH2B adaptor protein 3                                           | 0.269 |
| 15 | 6176354 | 6211838 | BRCA1-associated protein                                         | 0.269 |
| 15 | 6212456 | 6231931 | MAP kinase-activated protein kinase 5                            | 0.269 |
| 15 | 6254850 | 6258922 | Endoplasmic reticulum resident protein 29                        | 0.269 |
| 15 | 6259423 | 6286521 | N-alpha-acetyltransferase 25, NatB auxiliary subunit             | 0.269 |
| 15 | 6287966 | 6297369 | TRAF-type zinc finger domain containing 1                        | 0.269 |
| 15 | 6301498 | 6347392 | HECT domain containing E3 ubiquitin protein ligase 4             | 0.269 |
| 15 | 6377025 | 6380366 | 60S ribosomal protein L6                                         | 0.269 |
| 15 | 6380588 | 6402006 | Tyrosine-protein phosphatase non-receptor type 11                | 0.269 |
| 15 | 6429258 | 6443243 | rabphilin 3A homolog (mouse)                                     | 0.269 |
| 15 | 6530372 | 6560293 | coronin-1C                                                       | 0.269 |
| 15 | 6610623 | 6628850 | SV2 related protein homolog (rat)                                | 0.269 |
| 15 | 6631170 | 6642322 | ubiquitin specific peptidase 30                                  | 0.269 |
| 15 | 5789347 | 5790438 | UDP-GlcNAc:betaGal beta-1,3-N-acetylglucosaminyltransferase 4    | 0.269 |

|    |          |          |                                                                                               |       |
|----|----------|----------|-----------------------------------------------------------------------------------------------|-------|
| 15 | 7678294  | 7690938  | serine/threonine-protein kinase Chk2                                                          | 0.234 |
| 15 | 7691060  | 7694579  | HscB iron-sulfur cluster co-chaperone homolog (E. coli)                                       | 0.234 |
| 15 | 7713031  | 7716156  | X-box binding protein 1                                                                       | 0.234 |
| 15 | 7808411  | 7819197  | kringle containing transmembrane protein 1                                                    | 0.234 |
| 15 | 7829620  | 7845797  | sushi domain containing 2                                                                     | 0.234 |
| 15 | 7877611  | 7915137  | DiGeorge syndrome critical region gene 2                                                      | 0.234 |
| 15 | 7928727  | 7933299  | Ig lambda chain V-1 region                                                                    | 0.234 |
| 15 | 7998509  | 8008463  | SWI/SNF-related matrix-associated actin-dependent regulator of chromatin subfamily B member 1 | 0.234 |
| 15 | 8010321  | 8014793  | Der1-like domain family, member 3                                                             | 0.234 |
| 15 | 11212414 | 11257367 | kinase suppressor of ras 2                                                                    | 0.213 |
| 15 | 11287023 | 11315239 | Nitric oxide synthase                                                                         | 0.213 |
| 15 | 11340779 | 11343535 | tescalcin                                                                                     | 0.213 |
| 15 | 11434073 | 11439615 | UPF0454 protein C12orf49 homolog                                                              | 0.213 |
| 17 | 9403856  | 9424535  | G protein-coupled receptor 144                                                                | 0.204 |
| 17 | 10290287 | 10360101 | Ras-specific guanine nucleotide-releasing factor RalGPS1                                      | 0.233 |
| 17 | 10385180 | 10393957 | solute carrier family 2, facilitated glucose transporter member 8                             | 0.233 |
| 17 | 10406697 | 10443313 | GTPase-activating Rap/Ran-GAP domain-like protein 3                                           | 0.233 |
| 18 | 2569645  | 2666638  | protoheme IX farnesyltransferase, mitochondrial                                               | 0.204 |
| 18 | 7205116  | 7244436  | voltage-dependent calcium channel gamma-4 subunit                                             | 0.202 |
| 19 | 955427   | 1061274  | calneuron 1                                                                                   | 0.200 |
| 20 | 1510312  | 1559445  | ubiquinol-cytochrome c reductase complex chaperone                                            | 0.221 |
| 20 | 1565847  | 1590302  | family with sequence similarity 83, member C                                                  | 0.221 |
| 20 | 1591146  | 1598063  | eukaryotic translation initiation factor 6                                                    | 0.221 |
| 20 | 1601528  | 1644296  | matrix metalloproteinase 24 (membrane-inserted)                                               | 0.221 |
| 20 | 1643850  | 1862123  | adenosylhomocysteinase                                                                        | 0.221 |
| 20 | 3952514  | 3969262  | myb-related protein B                                                                         | 0.197 |
| 20 | 3973501  | 3984095  | intraflagellar transport protein 52 homolog                                                   | 0.197 |
| 20 | 4000630  | 4004091  | solute carrier family 32 (GABA vesicular transporter), member 1                               | 0.197 |
| 20 | 4036301  | 4076622  | Rho GTPase-activating protein 18-like                                                         | 0.197 |
| 20 | 4080901  | 4091173  | Actin-related protein 5                                                                       | 0.197 |

|    |         |         |                                                                                      |       |
|----|---------|---------|--------------------------------------------------------------------------------------|-------|
| 20 | 4109316 | 4154694 | protein phosphatase 1 regulatory inhibitor subunit 16B                               | 0.197 |
| 20 | 4159058 | 4165656 | family with sequence similarity 83, member D                                         | 0.197 |
| 20 | 5675050 | 5678607 | potassium channel, subfamily K, member 15                                            | 0.282 |
| 20 | 5687014 | 5690326 | WNT1 inducible signaling pathway protein 2                                           | 0.282 |
| 20 | 5699881 | 5712513 | adenosine deaminase                                                                  | 0.282 |
| 20 | 5740430 | 5750933 | serine incorporator 3 precursor                                                      | 0.282 |
| 20 | 5748294 | 5755903 | alpha-tocopherol transfer protein-like                                               | 0.282 |
| 20 | 5763173 | 5777781 | hepatocyte nuclear factor 4-alpha                                                    | 0.282 |
| 20 | 5792281 | 5795875 | R3H domain containing-like                                                           | 0.282 |
| 20 | 5837979 | 5845069 | uncharacterized protein C20orf111 homolog                                            | 0.282 |
| 20 | 5847927 | 5855091 | junctophilin 2                                                                       | 0.282 |
| 20 | 5895586 | 5918161 | solute carrier family 13 (sodium-dependent dicarboxylate transporter), member 3      | 0.282 |
| 20 | 5923593 | 5925045 | TP53 regulating kinase                                                               | 0.282 |
| 20 | 5928136 | 5935198 | solute carrier family 2 (facilitated glucose transporter), member 10                 | 0.282 |
| 20 | 6012484 | 6104467 | eyes absent homolog 2                                                                | 0.282 |
| 20 | 6203701 | 6257441 | nuclear receptor coactivator 3                                                       | 0.282 |
| 20 | 6529946 | 6608286 | phosphatidylinositol-3,4,5-trisphosphate-dependent Rac exchange factor 1             | 0.282 |
| 20 | 6685428 | 6743411 | ADP-ribosylation factor guanine nucleotide-exchange factor 2 (brefeldin A-inhibited) | 0.282 |
| 20 | 6747113 | 6768662 | CSE1 chromosome segregation 1-like (yeast)                                           | 0.282 |
| 20 | 6780571 | 6803177 | double-stranded RNA-binding protein Staufin homolog 1                                | 0.282 |
| 20 | 6994464 | 7004637 | transglutaminase 3                                                                   | 0.282 |
| 20 | 7082081 | 7177518 | phosphatase and actin regulator 3                                                    | 0.282 |
| 20 | 7219136 | 7226342 | family with sequence similarity 217, member B                                        | 0.282 |
| 20 | 7702268 | 8001028 | cadherin-4 precursor                                                                 | 0.282 |
| 20 | 7216161 | 7216973 | protein phosphatase 1, regulatory subunit 3D                                         | 0.282 |
| 20 | 6814040 | 6814131 | Small nucleolar SNORD12/SNORD106                                                     | 0.282 |
| 20 | 6811970 | 6812061 | Small nucleolar SNORD12/SNORD106                                                     | 0.282 |
| 20 | 6813048 | 6813139 | Small nucleolar SNORD12/SNORD106                                                     | 0.282 |
| 20 | 6814693 | 6814787 | Small nucleolar SNORD12/SNORD106                                                     | 0.282 |
| 21 | 2676648 | 2677571 | ring finger protein 223                                                              | 0.205 |

|    |          |          |                                                                          |       |
|----|----------|----------|--------------------------------------------------------------------------|-------|
| 21 | 2679190  | 2699394  | protein tyrosine phosphatase, non-receptor type 11-like                  | 0.205 |
| 21 | 2708871  | 2772320  | agrin                                                                    | 0.205 |
| 21 | 2803581  | 2805434  | transcription factor HES-1 isoform 2                                     | 0.205 |
| 21 | 2883797  | 2916830  | nucleolar complex protein 2 homolog                                      | 0.205 |
| 21 | 2919061  | 2959863  | sterile alpha motif domain-containing protein 11                         | 0.205 |
| 21 | 3033463  | 3151837  | arginine-glutamic acid dipeptide (RE) repeats                            | 0.205 |
| 21 | 4679337  | 4732155  | F-actin-capping protein subunit beta isoforms 1 and 2                    | 0.195 |
| 23 | 861071   | 915914   | human immunodeficiency virus type I enhancer binding protein 3           | 0.204 |
| 25 | 1033745  | 1035340  | beta-keratin                                                             | 0.243 |
| 25 | 1132880  | 1134156  | cornulin                                                                 | 0.243 |
| 25 | 1153918  | 1155640  | Protein S100-A11                                                         | 0.243 |
| 25 | 1156086  | 1174496  | coatamer subunit alpha                                                   | 0.243 |
| 25 | 1174614  | 1186654  | nicastrin precursor                                                      | 0.243 |
| 26 | 3240503  | 3333584  | potassium voltage-gated channel subfamily D member 3 precursor           | 0.206 |
| Z  | 942435   | 962360   | protein ERGIC-53 precursor                                               | 0.273 |
| Z  | 10001894 | 10166119 | ADAM metallopeptidase with thrombospondin type 1 motif, 12               | 0.288 |
| Z  | 10185692 | 10204950 | membrane-associated transporter protein                                  | 0.288 |
| Z  | 10206259 | 10227283 | alpha-methylacyl-CoA racemase                                            | 0.288 |
| Z  | 10173890 | 10175311 | relaxin/insulin-like family peptide receptor 3                           | 0.288 |
| Z  | 13833652 | 13891525 | fibroblast growth factor 10 precursor                                    | 0.293 |
| Z  | 19339904 | 19347539 | DIM1 dimethyladenosine transferase 1 homolog ( <i>S. cerevisiae</i> )    | 0.298 |
| Z  | 19348933 | 19422172 | importin 11                                                              | 0.298 |
| Z  | 19375862 | 19375973 | U4atac minor spliceosomal RNA                                            | 0.298 |
| Z  | 21981417 | 22025556 | cardiomyopathy associated 5                                              | 0.279 |
| Z  | 26708083 | 26866140 | GLIS family zinc finger 3                                                | 0.285 |
| Z  | 32180631 | 32551284 | basonuclin 2                                                             | 0.282 |
| Z  | 38331271 | 38431898 | transducin-like enhancer protein 4                                       | 0.328 |
| Z  | 39039875 | 39114050 | transducin-like enhancer of split 1 (E(sp1) homolog, <i>Drosophila</i> ) | 0.328 |
| Z  | 39574349 | 39615592 | RAS and EF-hand domain containing                                        | 0.328 |
| Z  | 39667818 | 39812156 | FERM domain containing 3                                                 | 0.328 |



|   |          |          |                                                                             |       |
|---|----------|----------|-----------------------------------------------------------------------------|-------|
| Z | 39900490 | 39924774 | kinesin family member 27                                                    | 0.328 |
| Z | 39936510 | 39954264 | Heterogeneous nuclear ribonucleoprotein K                                   | 0.328 |
| Z | 39954655 | 39958510 | recQ-mediated genome instability protein 1                                  | 0.328 |
| Z | 38576413 | 38576570 | U1 spliceosomal RNA                                                         | 0.328 |
| Z | 44617583 | 44658144 | CDC42 small effector 2                                                      | 0.314 |
| Z | 46011143 | 46145593 | erythrocyte membrane protein band 4.1 like 4A                               | 0.313 |
| Z | 46263610 | 46283078 | neuronal protein 3.1                                                        | 0.313 |
| Z | 46144006 | 46144137 | Small nucleolar RNA SNORA13                                                 | 0.313 |
| Z | 51826653 | 51834509 | tripartite motif-containing protein 14                                      | 0.301 |
| Z | 51836589 | 51845476 | sialic acid synthase                                                        | 0.301 |
| Z | 51863827 | 51878606 | clathrin light chain A                                                      | 0.301 |
| Z | 51882532 | 51919708 | bifunctional UDP-N-acetylglucosamine 2-epimerase/N-acetylmannosamine kinase | 0.301 |
| Z | 53357810 | 53404887 | alpha-L-iduronidase precursor                                               | 0.289 |
| Z | 53427128 | 53436199 | neuronal acetylcholine receptor subunit alpha-6 precursor                   | 0.289 |
| Z | 53439539 | 53450198 | neuronal acetylcholine receptor subunit beta-3 precursor                    | 0.289 |
| Z | 53495711 | 53516809 | RING finger protein 170                                                     | 0.289 |
| Z | 53516991 | 53592770 | hook homolog 3 (Drosophila)                                                 | 0.289 |
| Z | 54549996 | 54642132 | ATP-binding cassette sub-family A member 1                                  | 0.308 |
| Z | 54741875 | 54804427 | solute carrier family 44 (choline transporter), member 1                    | 0.308 |
| Z | 54832501 | 54860934 | fibronectin type III and SPRY domain containing 1-like                      | 0.308 |
| Z | 54866069 | 54882250 | fukutin                                                                     | 0.308 |
| Z | 54942939 | 54943102 | U1 spliceosomal RNA                                                         | 0.308 |
| Z | 62344745 | 62440821 | Hyaluronan and proteoglycan link protein 1                                  | 0.309 |
| Z | 63183171 | 63185001 | ribosomal protein S23                                                       | 0.303 |
| Z | 64830090 | 64898868 | glutamate receptor, ionotropic, N-methyl-D-aspartate 3A                     | 0.291 |
