# Supplementary material for: Population Genomic Analyses Based on 1 Million SNPs in Commercial Egg Layers
Source: PubMed Central journal article supplement (PMC3989219; doi:10.1371/journal.pone.0094509), 2014-04-16
Supplement: pone.0094509.s005.pdf [file pone.0094509.s005.pdf]

Table S5. List of pathways and gene ontologies in lower 1% distribution of the comparison of commercial layers and out-group.

| Description                                                      | # Genes anotated | Genes of pathways (%)* | P-Value |
|------------------------------------------------------------------|------------------|------------------------|---------|
| thiolester hydrolase activity                                    | 10               | 1.44                   | 0.001   |
| potassium channel                                                | 6                | 0.86                   | 0.002   |
| potassium ion binding                                            | 7                | 1.01                   | 0.003   |
| voltage-gated channel                                            | 6                | 0.86                   | 0.003   |
| potassium transport                                              | 7                | 1.01                   | 0.004   |
| ubiquitin thiolesterase activity                                 | 8                | 1.15                   | 0.004   |
| alkali metal ion binding                                         | 7                | 1.01                   | 0.007   |
| glutamine family amino acid metabolic process                    | 6                | 0.86                   | 0.007   |
| potassium                                                        | 7                | 1.01                   | 0.008   |
| macromolecule catabolic process                                  | 19               | 2.74                   | 0.010   |
| regulation of multicellular organism growth                      | 6                | 0.86                   | 0.010   |
| enzyme linked receptor protein signaling pathway                 | 15               | 2.16                   | 0.011   |
| behavior                                                         | 14               | 2.02                   | 0.012   |
| plasma membrane part                                             | 36               | 5.19                   | 0.012   |
| Golgi membrane                                                   | 10               | 1.44                   | 0.013   |
| plasma membrane                                                  | 52               | 7.49                   | 0.013   |
| GTPase activation                                                | 5                | 0.72                   | 0.014   |
| Posttranslational modification, protein turnover, chaperones     | 10               | 1.44                   | 0.015   |
| RNA splicing                                                     | 7                | 1.01                   | 0.019   |
| voltage-gated cation channel activity                            | 10               | 1.44                   | 0.019   |
| transmembrane receptor protein tyrosine kinase signaling pathway | 11               | 1.59                   | 0.021   |
| modification-dependent macromolecule catabolic process           | 13               | 1.87                   | 0.022   |
| modification-dependent protein catabolic process                 | 13               | 1.87                   | 0.022   |
| mRNA metabolic process                                           | 9                | 1.3                    | 0.022   |
| protein catabolic process                                        | 15               | 2.16                   | 0.023   |

|                                                            |    |      |       |
|------------------------------------------------------------|----|------|-------|
| proteolysis involved in cellular protein catabolic process | 14 | 2.02 | 0.023 |
| cellular protein catabolic process                         | 14 | 2.02 | 0.025 |
| regulation of growth                                       | 11 | 1.59 | 0.027 |
| activator                                                  | 13 | 1.87 | 0.030 |
| cellular macromolecule catabolic process                   | 16 | 2.31 | 0.030 |
| regulation of lipid metabolic process                      | 5  | 0.72 | 0.030 |
| voltage-gated potassium channel activity                   | 8  | 1.15 | 0.030 |
| proteolysis                                                | 30 | 4.32 | 0.035 |
| apical part of cell                                        | 6  | 0.86 | 0.037 |
| transcription activator activity                           | 10 | 1.44 | 0.037 |
| ubiquitin-dependent protein catabolic process              | 9  | 1.3  | 0.037 |
| Golgi apparatus part                                       | 11 | 1.59 | 0.040 |
| positive regulation of multicellular organismal process    | 9  | 1.3  | 0.043 |
| positive regulation of transferase activity                | 8  | 1.15 | 0.043 |
| gated channel activity                                     | 15 | 2.16 | 0.046 |
| in utero embryonic development                             | 9  | 1.3  | 0.046 |
| RNA polymerase II transcription factor activity            | 7  | 1.01 | 0.048 |

\*Percentage of the genes of the pathway which were among the annotated genes.
