# Supplementary material for: Population Genomic Analyses Based on 1 Million SNPs in Commercial Egg Layers
Source: PubMed Central journal article supplement (PMC3989219; doi:10.1371/journal.pone.0094509), 2014-04-16
Supplement: pone.0094509.s007.pdf [file pone.0094509.s007.pdf]

Table S7. List of pathways and gene ontologies in lower 1%  $F_{ST}$  distribution in comparison of brown layers and white layers.

| Description                                                          | # Genes anotated | Genes of pathways (%)* | P-Value |
|----------------------------------------------------------------------|------------------|------------------------|---------|
| plasma membrane                                                      | 50               | 8.80                   | 0.000   |
| plasma membrane part                                                 | 36               | 6.34                   | 0.000   |
| cell junction                                                        | 15               | 2.64                   | 0.001   |
| anti-apoptosis                                                       | 8                | 1.41                   | 0.003   |
| nucleotide binding                                                   | 72               | 12.68                  | 0.004   |
| RNA binding                                                          | 18               | 3.17                   | 0.006   |
| GTPase activation                                                    | 5                | 0.88                   | 0.007   |
| sensory organ development                                            | 12               | 2.11                   | 0.007   |
| enzyme linked receptor protein signaling pathway                     | 14               | 2.46                   | 0.009   |
| behavior                                                             | 13               | 2.29                   | 0.010   |
| cellular amino acid catabolic process                                | 5                | 0.88                   | 0.012   |
| regulation of growth                                                 | 11               | 1.94                   | 0.012   |
| sensory perception of sound                                          | 5                | 0.88                   | 0.012   |
| amine catabolic process                                              | 5                | 0.88                   | 0.017   |
| neuron differentiation                                               | 13               | 2.29                   | 0.017   |
| sensory perception of mechanical stimulus                            | 5                | 0.88                   | 0.017   |
| negative regulation of transcription                                 | 12               | 2.11                   | 0.019   |
| regulation of cell proliferation                                     | 19               | 3.35                   | 0.020   |
| ear development                                                      | 7                | 1.23                   | 0.022   |
| cell motility                                                        | 11               | 1.94                   | 0.023   |
| localization of cell                                                 | 11               | 1.94                   | 0.023   |
| cell motion                                                          | 13               | 2.29                   | 0.024   |
| N-Glycan biosynthesis                                                | 6                | 1.06                   | 0.024   |
| transcription activator activity                                     | 9                | 1.58                   | 0.028   |
| positive regulation of transcription from RNA polymerase II promoter | 13               | 2.29                   | 0.029   |
| regulation of multicellular organism growth                          | 5                | 0.88                   | 0.030   |
| negative regulation of gene expression                               | 12               | 2.11                   | 0.039   |

|                                                                                              |    |      |       |
|----------------------------------------------------------------------------------------------|----|------|-------|
| Notch signaling pathway                                                                      | 6  | 1.06 | 0.040 |
| cell migration                                                                               | 10 | 1.76 | 0.041 |
| negative regulation of cellular biosynthetic process                                         | 13 | 2.29 | 0.042 |
| carboxylic acid catabolic process                                                            | 5  | 0.88 | 0.043 |
| organic acid catabolic process                                                               | 5  | 0.88 | 0.043 |
| negative regulation of nucleobase, nucleoside, nucleotide and nucleic acid metabolic process | 12 | 2.11 | 0.047 |
| positive regulation of cell proliferation                                                    | 12 | 2.11 | 0.047 |
| negative regulation of biosynthetic process                                                  | 13 | 2.29 | 0.048 |
| basolateral plasma membrane                                                                  | 6  | 1.06 | 0.049 |

\*Percentage of the genes of the pathway which were among the annotated genes.
