# Supplementary material for: Population Genomic Analyses Based on 1 Million SNPs in Commercial Egg Layers
Source: PubMed Central journal article supplement (PMC3989219; doi:10.1371/journal.pone.0094509), 2014-04-16
Supplement: pone.0094509.s008.pdf [file pone.0094509.s008.pdf]

Table S8. List of pathways and gene ontologies in upper1%  $F_{ST}$  distribution in comparison of brown layers and white layers.

| <b>Description</b>                 | <b># Genes anotated</b> | <b>Genes of pathways (%)*</b> | <b>P-Value</b> |
|------------------------------------|-------------------------|-------------------------------|----------------|
| actin binding                      | 15                      | 2.6                           | 0.000          |
| actin cytoskeleton organization    | 12                      | 2.1                           | 0.000          |
| actin filament-based process       | 13                      | 2.2                           | 0.000          |
| adenyl nucleotide binding          | 65                      | 11.2                          | 0.000          |
| adenyl ribonucleotide binding      | 63                      | 10.9                          | 0.000          |
| ATP binding                        | 62                      | 10.7                          | 0.000          |
| atp-binding                        | 34                      | 5.9                           | 0.001          |
| cytoskeletal protein binding       | 18                      | 3.1                           | 0.001          |
| cytoskeleton organization          | 15                      | 2.6                           | 0.001          |
| cellular response to stress        | 18                      | 3.1                           | 0.002          |
| erythrocyte homeostasis            | 6                       | 1.0                           | 0.002          |
| nuclear envelope                   | 9                       | 1.6                           | 0.002          |
| phosphate metabolic process        | 40                      | 6.9                           | 0.002          |
| phosphorus metabolic process       | 40                      | 6.9                           | 0.002          |
| protein amino acid phosphorylation | 32                      | 5.5                           | 0.002          |
| protein kinase activity            | 31                      | 5.4                           | 0.002          |
| purine ribonucleotide binding      | 69                      | 11.9                          | 0.002          |
| ribonucleotide binding             | 69                      | 11.9                          | 0.002          |
| envelope                           | 19                      | 3.3                           | 0.003          |
| hemopoiesis                        | 12                      | 2.1                           | 0.003          |
| organelle envelope                 | 19                      | 3.3                           | 0.003          |
| phosphorylation                    | 35                      | 6.1                           | 0.003          |
| purine nucleotide binding          | 71                      | 12.3                          | 0.003          |
| homeostatic process                | 21                      | 3.6                           | 0.004          |
| immune system development          | 13                      | 2.2                           | 0.004          |
| nuclear chromosome part            | 8                       | 1.4                           | 0.004          |
| protein tyrosine kinase activity   | 13                      | 2.2                           | 0.004          |

|                                            |    |      |       |
|--------------------------------------------|----|------|-------|
| response to oxygen levels                  | 6  | 1.0  | 0.004 |
| transferase                                | 30 | 5.2  | 0.004 |
| anatomical structure homeostasis           | 7  | 1.2  | 0.007 |
| hemopoietic or lymphoid organ development  | 12 | 2.1  | 0.008 |
| nuclear chromosome                         | 8  | 1.4  | 0.008 |
| erythrocyte differentiation                | 5  | 0.9  | 0.009 |
| basolateral plasma membrane                | 8  | 1.4  | 0.010 |
| glycoprotein                               | 38 | 6.6  | 0.012 |
| glycosylation site:N-linked (GlcNAc...)    | 37 | 6.4  | 0.012 |
| Natural killer cell mediated cytotoxicity  | 9  | 1.6  | 0.012 |
| nucleotide binding                         | 78 | 13.5 | 0.012 |
| regulation of phosphorylation              | 13 | 2.2  | 0.012 |
| nucleotide phosphate-binding region:ATP    | 16 | 2.8  | 0.013 |
| regulation of cell adhesion                | 7  | 1.2  | 0.013 |
| actin-binding                              | 9  | 1.6  | 0.014 |
| kinase                                     | 19 | 3.3  | 0.015 |
| regulation of phosphate metabolic process  | 13 | 2.2  | 0.016 |
| regulation of phosphorus metabolic process | 13 | 2.2  | 0.016 |
| intracellular signaling cascade            | 28 | 4.8  | 0.018 |
| response to hypoxia                        | 5  | 0.9  | 0.018 |
| calcium                                    | 18 | 3.1  | 0.019 |
| lipid binding                              | 13 | 2.2  | 0.019 |
| positive regulation of signal transduction | 10 | 1.7  | 0.019 |
| topological domain:Cytoplasmic             | 28 | 4.8  | 0.019 |
| protein complex binding                    | 5  | 0.9  | 0.020 |
| cellular homeostasis                       | 13 | 2.2  | 0.021 |
| myeloid cell differentiation               | 6  | 1.0  | 0.022 |
| cell membrane                              | 22 | 3.8  | 0.023 |
| locomotory behavior                        | 9  | 1.6  | 0.023 |
| positive regulation of cell communication  | 10 | 1.7  | 0.024 |

|                                                             |    |     |       |
|-------------------------------------------------------------|----|-----|-------|
| behavior                                                    | 12 | 2.1 | 0.027 |
| DNA metabolic process                                       | 18 | 3.1 | 0.029 |
| transferase activity, transferring sulfur-containing groups | 6  | 1.0 | 0.030 |
| B cell activation                                           | 5  | 0.9 | 0.031 |
| calcium ion binding                                         | 29 | 5.0 | 0.033 |
| cell adhesion                                               | 10 | 1.7 | 0.033 |
| reproductive cellular process                               | 7  | 1.2 | 0.034 |
| phosphoprotein                                              | 26 | 4.5 | 0.035 |
| post-embryonic development                                  | 5  | 0.9 | 0.035 |
| cytosol                                                     | 13 | 2.2 | 0.037 |
| response to DNA damage stimulus                             | 12 | 2.1 | 0.039 |
| enzyme binding                                              | 10 | 1.7 | 0.040 |
| regulation of cell morphogenesis                            | 5  | 0.9 | 0.040 |
| homeostasis of number of cells                              | 6  | 1.0 | 0.041 |
| membrane fraction                                           | 11 | 1.9 | 0.043 |
| regulation of cell proliferation                            | 18 | 3.1 | 0.043 |
| cell migration                                              | 10 | 1.7 | 0.044 |
| topological domain:Extracellular                            | 22 | 3.8 | 0.044 |

\*Percentage of the genes of the pathway which were among the annotated genes.
